# Supplementary material for: Clinical and immunological features of an APLAID patient caused by a novel mutation in PLCG2
Source: Front Immunol. 2023 Jan 27;14:1014150. doi: 10.3389/fimmu.2023.1014150 (PMC9911665; doi:10.3389/fimmu.2023.1014150)
Supplement: Supplementary file 1 [file Table_1.xls]

proteinID	AveExp.A	AveExp.B	logFC	foldchange	regulation	entrezID	uniprotID
IL-13	2.292781749	6.21800615	-3.925224401	0.065824825	down	3596	P35225
M-CSF	7.76420813	9.802580986	-2.038372856	0.243438144	down	1435	P09603
IL-15	9.158357226	11.11153999	-1.95318276	0.25824588	down	3600	P40933
G-CSF	4.485426827	6.372603915	-1.887177088	0.270335506	down	1440	P09919
TGF-beta 1	10.54776213	12.15604514	-1.608283013	0.327988466	down	7040	P01137
MIP-1-alpha	9.253611152	10.45830407	-1.204692921	0.433861682	down	6348	P10147
TNF-alpha	9.482606308	10.53209288	-1.049486577	0.483140073	down	7124	P01375
IL8	11.47669558	12.41554373	-0.938848145	0.521649201	down	3576	P10145
IL-1a	9.537024216	10.39970517	-0.862680952	0.549929677	down	3552	P01583
IFN-gamma	8.843607046	9.520559754	-0.676952707	0.625485044	down	3458	P01579
IL-1beta	9.296686825	9.964456394	-0.667769569	0.629479121	down	3553	P01584
IL-2	7.819540461	8.424208288	-0.604667828	0.657622777	down	3558	P60568
GM-CSF	8.398316163	8.999943644	-0.60162748	0.659010118	down	1437	P04141
IL-6	7.223036338	7.807870078	-0.58483374	0.666726169	down	3569	P05231
IL-11	8.77445764	9.356870082	-0.582412443	0.667846086	down	3589	P20809
IL17	8.421644094	8.967485661	-0.545841567	0.68499171	down	3605	Q16552
IL12-p40	9.680183682	10.21777599	-0.537592305	0.688919679	down	3593	P29460
I-309	11.84073859	12.35488022	-0.514141625	0.700209419	down	6346	P22362
ICAM-1	14.02590951	14.50189999	-0.475990481	0.71897301	down	3383	P05362
MIG	8.406842755	8.818678034	-0.41183528	0.751666556	down	4283	Q07325
IL-10	10.69209238	11.10343863	-0.411346252	0.75192139	down	3586	P22301
TNF-beta	10.97434288	11.37456135	-0.400218467	0.757743529	down	4049	P01374
IL12-p70	9.17467606	9.503925094	-0.329249034	0.795950692	down	3593;3592	P29460/P29459
MIP-1-beta	12.31171994	12.63955777	-0.327837837	0.796729646	down	388372;6351	P13236
MCP-2	14.62610256	14.35267178	0.273430785	1.208678698	up	6355	P80075
IL-7	10.90944311	10.6050535	0.30438961	1.234896054	up	3574	P13232
IL-6 sR	14.2133245	13.82697742	0.386347078	1.307079668	up	3570	P08887
MCP-1	12.42846486	11.69852237	0.729942498	1.658572985	up	6347	P13500
sTNF-RI	12.3973805	11.60821323	0.789167271	1.728076722	up	7132	P19438
sTNF RII	13.32022234	12.4138421	0.906380244	1.874336838	up	7133	P20333
