# Supplementary material for: Clinical and immunological features of an APLAID patient caused by a novel mutation in PLCG2
Source: Front Immunol. 2023 Jan 27;14:1014150. doi: 10.3389/fimmu.2023.1014150 (PMC9911665; doi:10.3389/fimmu.2023.1014150)
Supplement: Supplementary file 2 [file Table_2.xlsx]

## Sheet: Sheet1
Table S2 Statistical table of gene expression in single cell RNA-seq
Sample	Estimated Number of Cells	Fraction Reads in Cells	Mean Reads per Cell	Median Genes per Cell	Total Genes Detected	Median UMI Counts per Cell
APLAID	6583	0.988	84153	1589	19984	6918
normal	5306	0.987	118093	1472	19763	5297
